# Supplementary material
Source: Springer Nature journal article supplement (https://www.springermedizin.de/resource/supplementary/12911_2013_754_MOESM4_ESM.pdf/9526590)
Supplement: MOESM4 [file 9526590]

**Appendix 4.**

**Review I: Effect of Health Literacy Interventions on Decision-Making Outcomes**

| Author, Date of Publication | Study Design            | Control | Intervention                                | Sample Sizes | % Population Limited Literacy or Education                                                             | Outcomes                                                                                                                                                                                                                                                                                                        | Difference                                                                                                                                           |
|-----------------------------|-------------------------|---------|---------------------------------------------|--------------|--------------------------------------------------------------------------------------------------------|-----------------------------------------------------------------------------------------------------------------------------------------------------------------------------------------------------------------------------------------------------------------------------------------------------------------|------------------------------------------------------------------------------------------------------------------------------------------------------|
| Volandes et al., 2010 [1]   | Quasi-exper. (Pre-Post) | N/A     | Video showing features of advanced dementia | 146          | 18% ≤ 6 <sup>th</sup> grade on REALM<br><br>21% grades 7-8 on REALM<br><br>61% ≥ 9 <sup>th</sup> grade | Mean uncertainty using Uncertainty subscale of Decisional Conflict Scale (range 3 to 15, with higher scores indicating less uncertainty)<br><br>Pre-intervention:<br>Low HL: 10.3<br>Marginal HL: 11.9<br>Adequate HL: 12.5<br><br>Post intervention:<br>Low HL: 13.9<br>Marginal HL: 14.4<br>Adequate HL: 14.6 | Adjusted mean change in uncertainty (post-pre), 95% CI:<br><br>Low HL: + 3.5 (2.5-4.6)<br>Marginal HL: +2.5 (1.5-3.5)<br>Adequate HL: +2.0 (1.3-2.8) |

*Abbreviations Used:*

HL: Health Literacy

REALM: Rapid Estimate of Adult Literacy in Medicine

## References

1. Volandes AE, Barry MJ, Chang YC, Paasche-Orlow MK: **Improving decision making at the end of life with video images.** *Med Decis Making* 2010, **30**:29-34.
